# Supplementary material for: Novel Genotype of HA Clade 2.3.4.4b H5N8 Subtype High Pathogenicity Avian Influenza Virus Emerged at a Wintering Site of Migratory Birds in Japan, 2021/22 Winter
Source: MDPI journal article supplement (doi:10.3390/pathogens13050380), 2024-05-02
Supplement: s1 [file s1]

## Supplementary Files

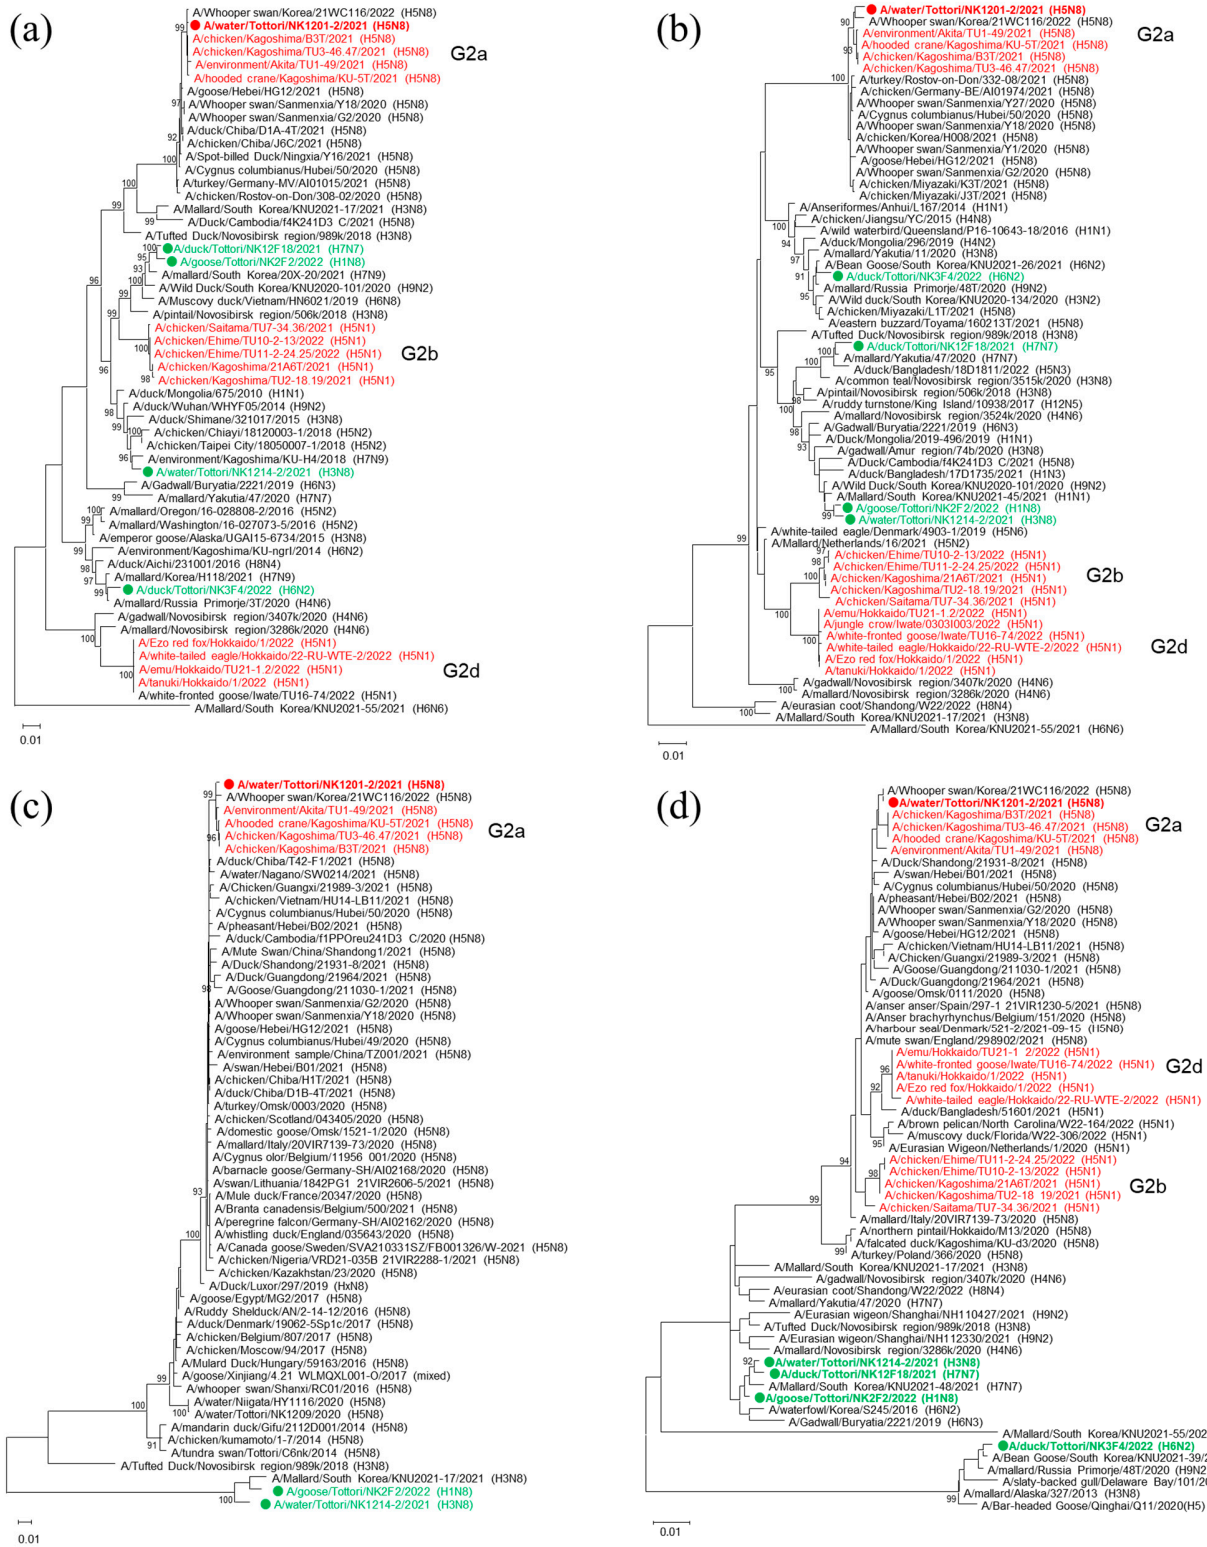

(e)

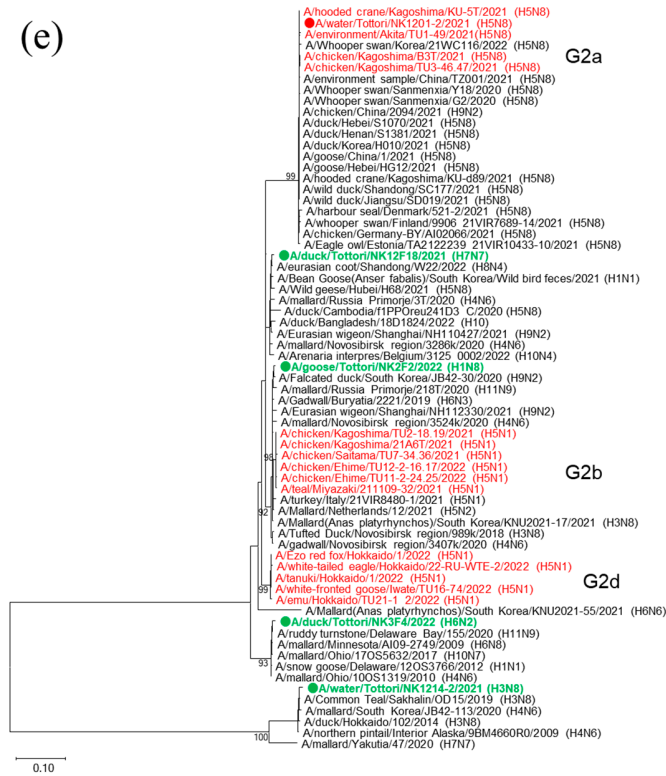

**Figure S1.** Phylogenetic trees based on coding region of five gene segments of NK1201 HPAIV and LPAIVs isolated at Nikko wintering site. PB2, 1-2280 bp (a); PA, 1-2151 bp (b); N8 NA, 1-1413 bp (c); M, 1-982 bp (d) and NS, 1-838 bp (e) trees were constructed using the maximum likelihood method with the general time-reversible model and 1,000 bootstrap replicates. G2a, G2b, and G2d indicate the classification of H5N8 and H5N1 HPAIVs isolated in the 2021-2022 winter season in Japan based on their HA gene sequences [19]. Bootstrap values >90% are shown at the nodes. Red: H5N8 HPAIVs isolated during 2021-2022 in Japan; Green: LPAIV isolates from wintering site for migratory birds in Tottori Prefecture. Filled circle indicate isolates in this study.

**Table S1:** Nucleotide and amino acid similarities of NK1201 genes to most closely related influenza viruses

| Genes                    | Closely related viruses                    | Collection date          | Nucleotide identity (%) | Amino acid identity (%) |
|--------------------------|--------------------------------------------|--------------------------|-------------------------|-------------------------|
| Polymerase basic 2 (PB2) | A/chicken/Kagoshima/TU3-46.47/2021 (H5N8)  | 2021-11-15               | 2277/2280 (99.87)       | 99.60                   |
|                          | A/chicken/Kagoshima/B3T/2021 (H5N8)        | 2021-11-14               | 2277/2280 (99.87)       | 99.60                   |
|                          | A/Whooper swan/Korea/21WC116/2022 (H5N8)   | 2022-01-23               | 2276/2280 (99.82)       | 99.60                   |
|                          | A/hooded crane/Kagoshima/KU-5T/2021 (H5N8) | 2021-11-19               | 2275/2280 (99.78)       | 99.60                   |
|                          | A/environment/Akita/TU1-49/2021 (H5N8)     | 2021-11-10               | 2273/2280 (99.69)       | 99.60                   |
|                          | A/mallard/Miyazaki/4501C605/2021 (H5N8)    | 2021-01-24               | 2271/2280 (99.69)       | 99.60                   |
| Polymerase Acidic (PA)   | A/hooded crane/Kagoshima/KU-5T/2021 (H5N8) | 2021-11-19               | 2139/2151 (99.44)       | 99.86                   |
|                          | A/chicken/Kagoshima/TU3-46.47/2021 (H5N8)  | 2021-11-15               | 2139/2151 (99.44)       | 99.86                   |
|                          | A/environment/Akita/TU1-49/2021 (H5N8)     | 2021-11-10               | 2139/2151 (99.44)       | 99.86                   |
|                          | A/chicken/Kagoshima/B3T/2021 (H5N8)        | 2021-11-14               | 2139/2151 (99.44)       | 99.86                   |
|                          | A/Whooper swan/Sanmenxia/Y18/2020 (H5N8)   | 2020-11-13               | 2138/2151 (99.40)       | 99.86                   |
|                          | A/Whooper swan/Sanmenxia/G2/2020 (H5N8)    | 2020-11-04               | 2138/2151 (99.40)       | 99.86                   |
|                          | A/Whooper swan/Sanmenxia/Y1/2020 (H5N8)    | 2020-10-30               | 2138/2151 (99.40)       | 99.86                   |
|                          | A/chicken/Korea/H008/2021 (H5N8)           | 2021-01-04               | 2138/2151 (99.40)       | 99.86                   |
|                          | A/Whooper swan/Sanmenxia/Y27/2020 (H5N8)   | 2020-11-16               | 2137/2151 (99.35)       | 99.86                   |
|                          | A/Whooper swan/Korea/21WC116/2022 (H5N8)   | 2022-01-23               | 2136/2151 (99.30)       | 99.86                   |
| Hemagglutinin (HA)       | A/Whooper swan/Korea/21WC116/2022 (H5N8)   | 2022-01-23               | 1694/1704 (99.41)       | 99.29                   |
|                          | A/environment/Akita/TU1-49/2021 (H5N8)     | 2021-11-10               | 1691/1704 (99.24)       | 98.94                   |
|                          | A/Whooper swan/Sanmenxia/H735/2020 (H5N8)  | 2020-11-11               | 1691/1704 (99.24)       | 98.94                   |
|                          | A/goose/Hebei/HG12/2021 (H5N8)             | 2021-01<br>(Day unknown) | 1691/1704 (99.24)       | 98.94                   |
|                          | A/Duck/Shandong/21232-5/2021 (H5N8)        | 2021-03<br>(Day unknown) | 1691/1704 (99.24)       | 98.94                   |
|                          | A/Goose/Shandong/21153-3/2021 (H5N8)       | 2021-02-01               | 1691/1704 (99.24)       | 98.94                   |
|                          | A/chicken/Akita/7C/2021 (H5N8)             | 2021-11-09               | 1691/1704 (99.24)       | 98.94                   |
|                          | A/chicken/Korea/H544/2020 (H5N8)           | 2020-12-29               | 1691/1704 (99.24)       | 98.94                   |
|                          | A/chicken/Kagoshima/TU3-46.47/2021 (H5N8)  | 2021-11-15               | 1690/1704 (99.18)       | 99.12                   |
|                          | A/chicken/Kagoshima/B3T/2021 (H5N8)        | 2021-11-14               | 1690/1704 (99.18)       | 99.12                   |
|                          | A/hooded crane/Kagoshima/KU-5T/2021 (H5N8) | 2021-11-19               | 1689/1704 (99.12)       | 99.12                   |
| Neuraminidase (NA)       | A/environment/Akita/TU1-49/2021 (H5N8)     | 2021-11-10               | 1406/1413 (99.50)       | 99.15                   |
|                          | A/chicken/Kagoshima/TU3-46.47/2021 (H5N8)  | 2021-11-15               | 1404/1413 (99.36)       | 99.36                   |
|                          | A/chicken/Kagoshima/B3T/2021 (H5N8)        | 2021-11-14               | 1404/1413 (99.36)       | 99.36                   |
|                          | A/hooded crane/Kagoshima/KU-5T/2021 (H5N8) | 2021-11-19               | 1404/1413 (99.36)       | 99.36                   |
|                          | A/Whooper swan/Korea/21WC116/2022 (H5N8)   | 2022-01-23               | 1403/1413 (99.29)       | 98.94                   |
|                          | A/Whooper swan/Sanmenxia/Y21/2020 (H5N8)   | 2020-11-14               | 1401/1413 (99.15)       | 98.94                   |

**Table S1:** Nucleotide and amino acid similarities of NK1201 genes to most closely related influenza viruses (continued)

|                            |                                               |                          |                 |                          |
|----------------------------|-----------------------------------------------|--------------------------|-----------------|--------------------------|
| Matrix protein (M)         | A/Whooper swan/Korea/21WC116/2022 (H5N8)      | 2022-01-23               | 981/982 (99.90) | M1: 100<br>M2: 100       |
|                            | A/environment/Tokushima/T47-36/2021 (H5N8)    | 2021-02-09               | 980/982 (99.80) | M1: 100<br>M2: 100       |
|                            | A/hooded crane/Kagoshima/KU-d89/2021 (H5N8)   | 2021-01-16               | 980/982 (99.80) | M1: 100<br>M2: 100       |
|                            | A/chicken/China/JM01/2020 (H5N8)              | 2020-12<br>(Day unknown) | 980/982 (99.80) | M1: 100<br>M2: 100       |
|                            | A/tundra swan/Shanghai/CM20111601/2020 (H5N8) | 2020-11-16               | 980/982 (99.80) | M1: 100<br>M2: 100       |
|                            | A/Whooper swan/Sanmenxia/Y25/2020 (H5N8)      | 2020-11-18               | 980/982 (99.80) | M1: 100<br>M2: 100       |
|                            | A/environment/Akita/TU1-49/2021 (H5N1)        | 2021-11-10               | 979/982 (99.69) | M1: 100<br>M2: 98.97     |
|                            | A/chicken/Kagoshima/B3T/2021 (H5N8)           | 2021-02-08               | 978/982 (99.59) | M1: 100<br>M2: 100       |
| Nonstructural protein (NS) | A/hooded crane/Kagoshima/KU-5T/2021 (H5N8)    | 2021-11-19               | 837/838 (99.88) | NS1: 100<br>NS2: 100     |
|                            | A/hooded crane/Kagoshima/KU-d89/2021 (H5N8)   | 2021-01-16               | 836/838 (99.76) | NS1: 100<br>NS2: 100     |
|                            | A/goose/China/1/2021 (H5N8)                   | 2021-01-29               | 836/838 (99.76) | NS1: 100<br>NS2: 100     |
|                            | A/goose/Hebei/HG12/2021 (A/H5N8)              | 2021-01<br>(Day unknown) | 836/838 (99.76) | NS1: 100<br>NS2: 100     |
|                            | A/Whooper swan/Sanmenxia/Y12/2020 (H5N8)      | 2020-11-08               | 836/838 (99.76) | NS1: 100<br>NS2: 100     |
|                            | A/chicken/China/2094/2021 (H9N2)              | 2021-11-12               | 836/838 (99.76) | NS1: 100<br>NS2: 100     |
|                            | A/chicken/Kagoshima/B3T/2021 (H5N8)           | 2021-11-14               | 836/838 (99.76) | NS1: 100<br>NS2: 100     |
|                            | A/wild goose/Shandong/SC196/2021 (H5N8)       | 2021-01-23               | 834/838 (99.52) | NS1: 99.54<br>NS2: 99.17 |
|                            | A/Whooper swan/Korea/21WC116/2022 (H5N8)      | 2022-01-23               | 834/838 (99.52) | NS1: 99.54<br>NS2: 99.17 |

### LPAIV genes amplification

The PCR mixture was prepared in a final volume of 20 µl containing; 10µl of GoTaq® green master mix (a premixed ready-to-use solution containing GoTaq® DNA polymerase supplied in 2X Green GoTaq® reaction buffer (pH 8.5), 400 µM dATP, 400 µM dGTP, 400 µM dCTP, 400 µM dTTP and 3 mM MgCl<sub>2</sub>), 1 µl of each 10 µM forward and reverse primers, 7.5 µl of DNase/RNase free water and 0.5 µl of cDNA.

PCR condition: 95°C for 2 minutes of denaturation and 35 cycles of 95°C for 30 seconds, 55°C for 30 seconds, and 72°C for 1 minute followed by a final extension at 72°C for 5 minutes.

### Gel-electrophoresis result of one of the LPAIV (NK12F18-H7N7)

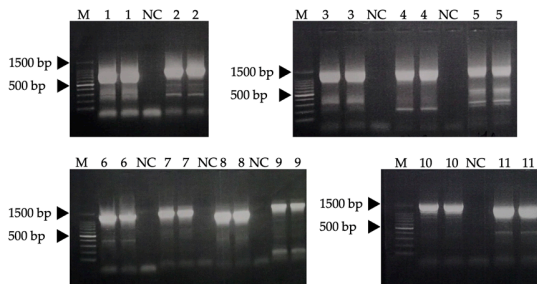

M: DNA ladder (100 bp); 1 (NS, 890 bp); 2 (M, 1027 bp); 3 (NA, 1413 bp), 4 (NP, 1565 bp); 5 (HA, 1778 bp); 6 (PB1a, 1246 bp); 7 (PB1b, 1431 bp); 8 (PAb, 1159 bp); 9 (PAa, 1487 bp); 10 (PB2a, 1473 bp); 11 (PB2b, 1260 bp); NC, negative control. For each gene, 20  $\mu$ l of PCR reaction was divided into 10  $\mu$ l and loaded into two wells. The large segments (PB2, PB1, and PA) were divided into two segments for ease of amplification using universal primers designed by Hoffmann *et al.* [27] and primers designed in our laboratory by primer plus 3 program (<https://www.primer3plus.com/index.html>). The full segment was amplified for HA, NP, NA, NS, and M genes using universal primers designed by Hoffmann *et al.* [27].
